# Supplementary material for: Investigations into SARS-CoV-2 and other coronaviruses on mink farms in France late in the first year of the COVID-19 pandemic
Source: PubMed Central journal article supplement (PMC10456147; doi:10.1371/journal.pone.0290444), 2023-08-25
Supplement: pone.0290444.s007.pdf [file pone.0290444.s007.pdf]

We gratefully acknowledge the following Authors from the Originating laboratories responsible for obtaining the specimens, as well as the Submitting laboratories where the genome data were generated and shared via GISAID, on which this research is based.

All Submitters of data may be contacted directly via [www.gisaid.org](http://www.gisaid.org)

Authors are sorted alphabetically.

| Accession ID    | Originating Laboratory                                                                                                                        | Submitting Laboratory                                                                                                                             | Authors                                                                                                                                                                                   |
|-----------------|-----------------------------------------------------------------------------------------------------------------------------------------------|---------------------------------------------------------------------------------------------------------------------------------------------------|-------------------------------------------------------------------------------------------------------------------------------------------------------------------------------------------|
| EPI_ISL_5781754 | Bronson Animal Disease Diagnostic Laboratory                                                                                                  | Diagnostic Virology Laboratory, National Veterinary Services Laboratories, USDA1920 Dayton Avenue, Ames, IA 50010, USA                            | Emily R. Love; Kerrie M. Franzen; Mary L. Killian; Mia Torchetti; Suelee Robbe-Austerman; Tod P. Stuber                                                                                   |
| EPI_ISL_2521999 | The Laboratory of Biosafety with Pathogens Collection The Republican Research and Practical Center for Epidemiology and Microbiology (RRPCEM) | Laboratory for HIV and opportunistic infections diagnosis The Republican Research and Practical Center for Epidemiology and Microbiology (RRPCEM) | Anatoli Krasko; Artur Akhremchuk; Elena Gasich; Ilarion Kupryianav; Iryna Subotsina; Kirill Bulda; Larysa Radzienava; Leonid Valentovich; Olga Klimovich; Olga Saleuskaya; Sergei Semenov |
| EPI_ISL_1490186 | University of Ljubljana, Faculty of Veterinary Medicine                                                                                       | Institute of Microbiology and Immunology, Faculty of Medicine, University of Ljubljana                                                            | Ana Kočevar; Brigita Slavec; Jožko Račnik; Mario Poljak; Matic Brvar; Milan Matko; Miša Korva; Olga Zorman Rojs; Samo Zakotnik; Tatjana Avšič - Županc; Tomaž Mark Zorec                  |
